# Supplementary material
Source: HighWire-hosted journal article supplement (https://srh.bmj.com/content/44/4/299)
Supplement: inline-supplementary-material-1 [file inline-supplementary-material-1.xlsx]

## Sheet: Calculator
	COST SAVINGS CALCULATOR UNITED KINGDOM						Whilst this is an extremely useful tool, its ouput is dependent upon the input the operator gives. The sections on the left will require you in some cases to fill-in certain pieces of information which have been left blank on purpose for users to be able to calculate relative to their locality.
	PATIENTS
							Investigation means any investigation of any type, e.g. urea & electrolytes, chest x-ray, urine. You need to know the cost per investigation. We have not supplied it as the unit cost can vary considerably. It is important to know how much it costs in your own clinical environment.
		Cost per Med	No of Med	No of days	Total		Medication means any medication of any type, e.g. fluids, anti-emetics, antibiotics, analgesia etc. You need to know the cost per medication. We have not supplied it as the unit cost can vary considerably depending on the manufacturer.
	MEDICATION(S)
	POP	1.5	70	1	105
	COC	1	70	1	70
	To add medication, add a new row above the last row				175
	DOCTOR/NURSE
	TIME	Cost per hour	No of hours	No of days	Total
	Consultant DNA	55	55	1	3025			761 appointsment referral .cancellation/DNA 11% =84 x 40 minx: 60min
					3025
	HC PROFESSIONAL (any healthcare professional other than a doctor)
	TIME	Cost per hour	No of hours	No of days	Total
	Professional	30	718	1	21540			This estimate is a sum of administration /doctor/nurse time . 588 referrals MPC, average 2.35 telefone face to face contacts =20min, 2.63 communication =10min
	To add professionals, add a new row above the last row				21540
	TOTAL SAVING				24740		Take the blue number, go back to your workbook and insert it in there.
